# Supplementary material for: Analysis of Genetic Alterations in Ocular Adnexal Mucosa-Associated Lymphoid Tissue Lymphoma With Whole-Exome Sequencing
Source: Front Oncol. 2022 Mar 11;12:817635. doi: 10.3389/fonc.2022.817635 (PMC8962736; doi:10.3389/fonc.2022.817635)
Supplement: Supplementary file 4 [file Table_4.xlsx]

## Sheet: Supplemental Table 4
Name of pathway	Database	ID	Number of mutations	Size of pathway gene set	Mutation rates	Invovled genes
NF-kappa B signaling pathway	KEGG PATHWAY	hsa04064	14	100	0.14	TRAF3,TNFAIP3,IKBKB,MAP3K14,MYD88,BTK
IL-17 signaling pathway	KEGG PATHWAY	hsa04657	10	93	0.107527	IKBKB,TRAF3,TNFAIP3
TNF signaling pathway	KEGG PATHWAY	hsa04668	11	112	0.0982143	IKBKB,TRAF3,MAP3K14,TNFAIP3
Mismatch repair	KEGG PATHWAY	hsa03430	4	23	0.087	MSH3,MSH6
Lysine degradation	KEGG PATHWAY	hsa00310	5	59	0.0847458	DOT1L,KMT2A,SETD2,KMT2D
NOD-like receptor signaling pathway	KEGG PATHWAY	hsa04621	13	178	0.0730337	IKBKB,TYK2,MYD88,TRAF3,TNFAIP3
EGFR tyrosine kinase inhibitor resistance	KEGG PATHWAY	hsa01521	5	79	0.0632911	ERBB2,ARAF,JAK2,BRAF,MET
Central carbon metabolism in cancer	KEGG PATHWAY	hsa05230	4	69	0.057971	ERBB2,MET,RET,KIT
PD-L1 expression and PD-1 checkpoint pathway in cancer	KEGG PATHWAY	hsa05235	5	89	0.0561798	IKBKB,MYD88,JAK2,ALK
Jak-STAT signaling pathway	KEGG PATHWAY	hsa04630	9	162	0.0555556	CRLF2,TYK2,JAK2,CREBBP
Adherens junction	KEGG PATHWAY	hsa04520	4	72	0.0555556	ERBB2,MET,CREBBP
FoxO signaling pathway	KEGG PATHWAY	hsa04068	7	132	0.0530303	IRS2,IKBKB,ARAF,BRAF,BCL6,CREBBP
Homologous recombination	KEGG PATHWAY	hsa03440	2	41	0.0487805	BRCA1,BRCA2
Toll-like receptor signaling pathway	KEGG PATHWAY	hsa04620	5	104	0.0480769	IKBKB,MYD88,TRAF3
RIG-I-like receptor signaling pathway	KEGG PATHWAY	hsa04622	3	70	0.0428571	IKBKB,TRAF3
Endocrine resistance	KEGG PATHWAY	hsa01522	4	98	0.0408163	ERBB2,ARAF,BRAF,GNAS
Regulation of lipolysis in adipocytes	KEGG PATHWAY	hsa04923	2	55	0.0363636	IRS2,GNAS
Pathways in cancer	KEGG PATHWAY	hsa05200	19	530	0.0358491	ERBB2,BRCA2,ALK,MSH6,GNAS,NFE2L2,MSH3,RET,KIT,IKBKB,MET,TRAF3,ARAF,BRAF,JAK2,CREBBP
ErbB signaling pathway	KEGG PATHWAY	hsa04012	3	85	0.0352941	ERBB2,ARAF,BRAF
Th1 and Th2 cell differentiation	KEGG PATHWAY	hsa04658	3	92	0.0326087	IKBKB,TYK2,JAK2
Transcriptional misregulation in cancer	KEGG PATHWAY	hsa05202	6	186	0.0322581	DOT1L,MYCN,KMT2A,BCL6,MET
Wnt signaling pathway	KEGG PATHWAY	hsa04310	5	160	0.03125	CHD8,RNF43,TBL1XR1,CREBBP
Necroptosis	KEGG PATHWAY	hsa04217	5	162	0.0308642	TYK2,JAK2,TNFAIP3
MAPK signaling pathway	KEGG PATHWAY	hsa04010	9	295	0.0305085	ERBB2,KIT,IKBKB,MET,ARAF,BRAF,MAP3K14,MYD88
Parathyroid hormone synthesis, secretion and action	KEGG PATHWAY	hsa04928	3	106	0.0283019	ARAF,BRAF,GNAS
Glucagon signaling pathway	KEGG PATHWAY	hsa04922	3	106	0.0283019	CREBBP,GNAS
Th17 cell differentiation	KEGG PATHWAY	hsa04659	3	107	0.0280374	IKBKB,TYK2,JAK2
HIF-1 signaling pathway	KEGG PATHWAY	hsa04066	3	109	0.0275229	ERBB2,CREBBP
MicroRNAs in cancer	KEGG PATHWAY	hsa05206	8	299	0.0267559	BRCA1,ERBB2,DNMT1,IRS2,IKBKB,MET,CREBBP
Serotonergic synapse	KEGG PATHWAY	hsa04726	3	115	0.026087	ARAF,BRAF,GNAS
Viral carcinogenesis	KEGG PATHWAY	hsa05203	5	201	0.0248756	HIST1H2BD,TRAF3,CREBBP
Autophagy - animal	KEGG PATHWAY	hsa04140	3	128	0.0234375	PIK3C3,IRS2,TSC1
Human T-cell leukemia virus 1 infection	KEGG PATHWAY	hsa05166	5	219	0.0228311	IKBKB,XPO1,MAP3K14,CREBBP
Vascular smooth muscle contraction	KEGG PATHWAY	hsa04270	3	132	0.0227273	ARAF,BRAF,GNAS
PI3K-Akt signaling pathway	KEGG PATHWAY	hsa04151	8	354	0.0225989	BRCA1,ERBB2,KIT,IKBKB,MET,JAK2,PAK1,TSC1
Phospholipase D signaling pathway	KEGG PATHWAY	hsa04072	3	148	0.0202703	GNAS,TSC1,KIT
Proteoglycans in cancer	KEGG PATHWAY	hsa05205	4	203	0.0197044	ERBB2,MET,ARAF,BRAF
mTOR signaling pathway	KEGG PATHWAY	hsa04150	3	153	0.0196078	IKBKB,BRAF,TSC1
T cell receptor signaling pathway	KEGG PATHWAY	hsa04660	2	103	0.0194175	IKBKB,MAP3K14
C-type lectin receptor signaling pathway	KEGG PATHWAY	hsa04625	2	104	0.0192308	IKBKB,MAP3K14
Rap1 signaling pathway	KEGG PATHWAY	hsa04015	4	210	0.0190476	MET,GNAS,BRAF,KIT
cAMP signaling pathway	KEGG PATHWAY	hsa04024	4	214	0.0186916	BRAF,CREBBP,GNAS
Insulin resistance	KEGG PATHWAY	hsa04931	2	108	0.0185185	IKBKB,IRS2
Ras signaling pathway	KEGG PATHWAY	hsa04014	4	232	0.0172414	IKBKB,MET,SHOC2,KIT
Neurotrophin signaling pathway	KEGG PATHWAY	hsa04722	2	119	0.0168067	IKBKB,BRAF
AMPK signaling pathway	KEGG PATHWAY	hsa04152	2	120	0.0166667	IRS2,TSC1
Axon guidance	KEGG PATHWAY	hsa04360	3	181	0.0165746	ROBO1,MET,EPHB1
Platelet activation	KEGG PATHWAY	hsa04611	2	124	0.016129	BTK,GNAS
Chemokine signaling pathway	KEGG PATHWAY	hsa04062	3	190	0.0157895	IKBKB,JAK2,BRAF
Natural killer cell mediated cytotoxicity	KEGG PATHWAY	hsa04650	2	131	0.0152672	ARAF,BRAF
Focal adhesion	KEGG PATHWAY	hsa04510	3	199	0.0150754	ERBB2,MET,BRAF
Apoptosis	KEGG PATHWAY	hsa04210	2	136	0.0147059	IKBKB,MAP3K14
Apelin signaling pathway	KEGG PATHWAY	hsa04371	2	137	0.0145985	MEF2B,PIK3C3
Fluid shear stress and atherosclerosis	KEGG PATHWAY	hsa05418	2	139	0.0143885	IKBKB,NFE2L2
Table2. pathways most frequently affected by somatic mutations in Chines OAML.
